# Supplementary material for: Facile synthesis of SAPO-34 with excellent methanol-to-olefin activity in a short time via a conventional hydrothermal method
Source: Royal Society of Chemistry journal article supplement (doi:10.1039/d0nj01550d), 2020-01-01
Supplement: d0nj01550d1.pdf [file d0nj01550d1.pdf]

**Electronic Supplementary Information**

**Facile synthesis of SAPO-34 with excellent methanol-to-olefin activity in a short time via conventional hydrothermal method**

Feifei Gong, Xiaotong Wang, Peiqiang Wang, Lu Xuan, Zhibin Li\*, Yujun Zhu\*

Key Laboratory of Functional Inorganic Material Chemistry (Heilongjiang University),  
Ministry of Education, School of Chemistry and Materials Science, Heilongjiang University,  
Harbin 150080, P R China.

\*Corresponding authors: E-mail: yujunzhu@hlju.edu.cn (Yujun Zhu); lizb@hlju.edu.cn  
(Zhibin Li)

Table S1 Weight loss of the deactivated samples from the TG curves.

| Sample      | Weight loss (%) |                 |      |
|-------------|-----------------|-----------------|------|
|             | I <sup>a</sup>  | II <sup>b</sup> | I+II |
| SAPO-34-3h  | 4.0             | 10.8            | 14.8 |
| SAPO-34-4h  | 13.5            | 16.8            | 30.3 |
| SAPO-34-8h  | 3.7             | 10.5            | 14.2 |
| SAPO-34-12h | 4.5             | 9.7             | 14.2 |
| SAPO-34-24h | 4.2             | 9.8             | 14.0 |
| SAPO-34-48h | 4.3             | 11.6            | 15.9 |

[a] The first weight loss (< 400 °C)

[b] The second weight loss (400-650 °C)

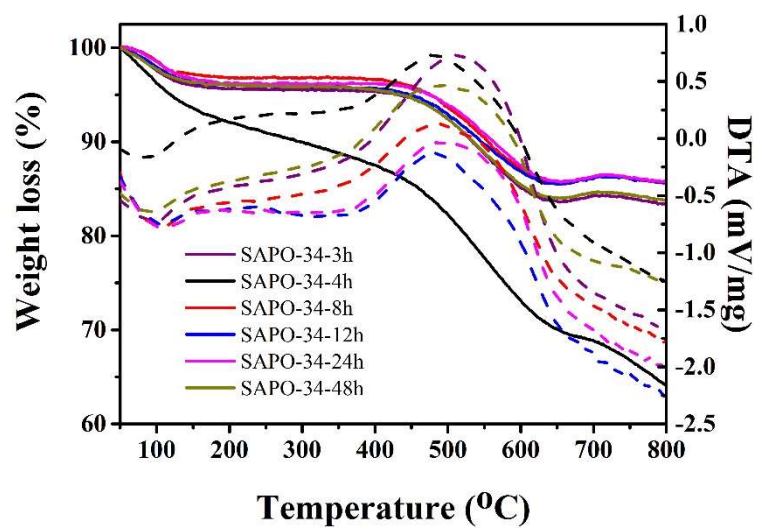

Fig. S1 TG-DTA curves of as-synthesized samples after methanol conversions at 400 °C.

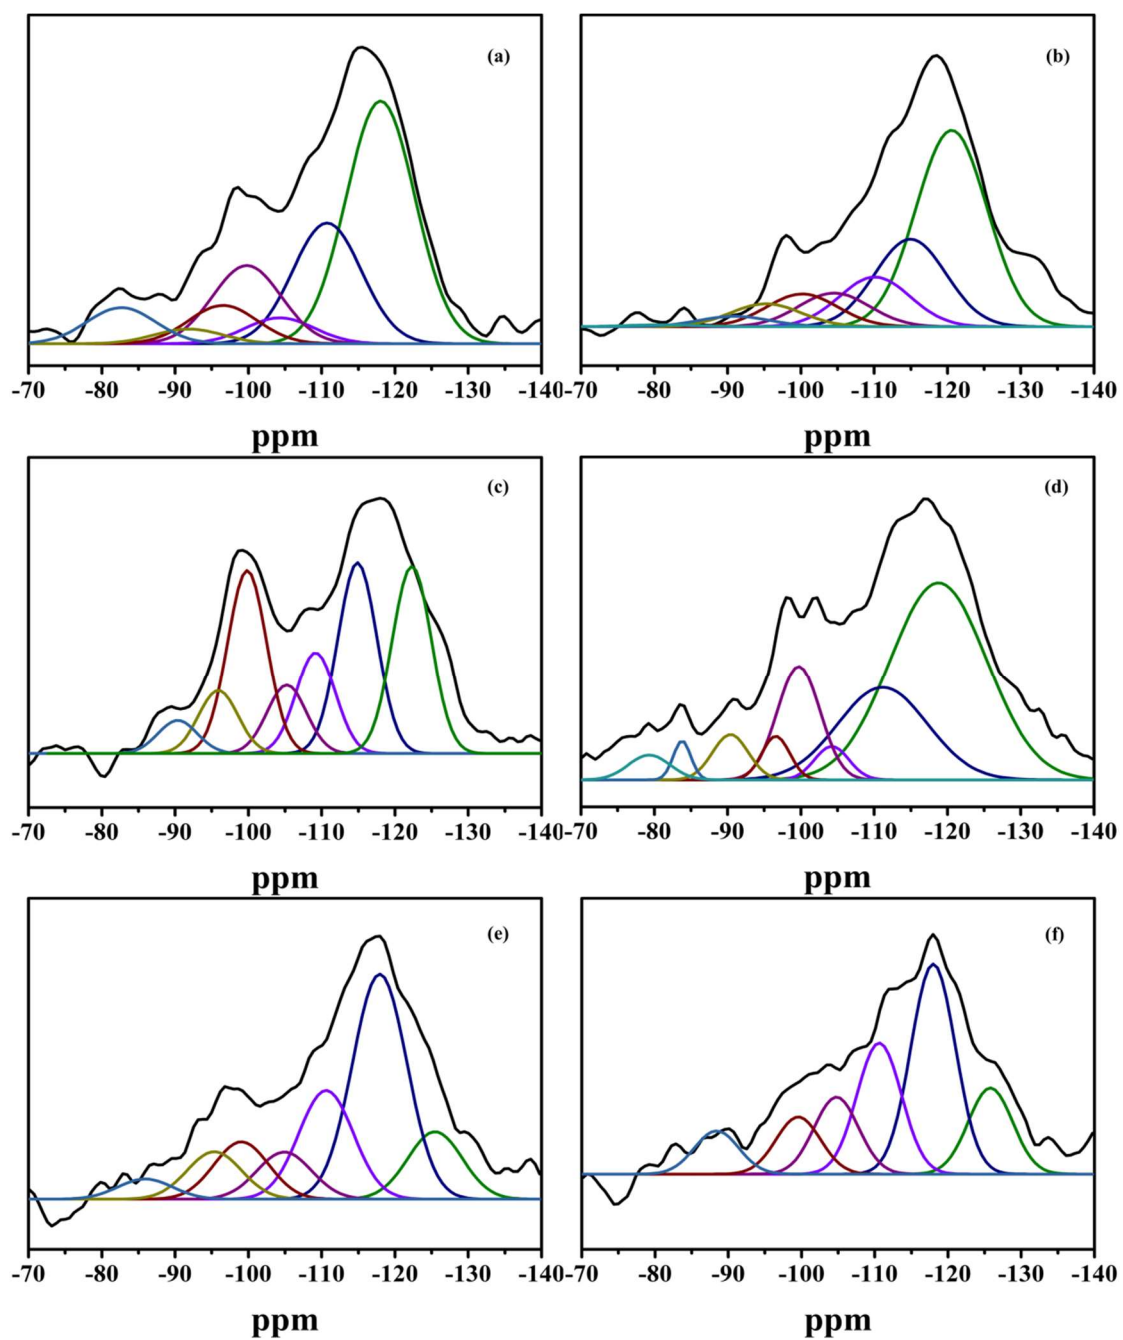

Fig. S2  $^{29}\text{Si}$  MAS NMR peak-differentiation-imitating analysis results of SAPO-34-3h (a), SAPO-34-4h (b), SAPO-34-8h (c), SAPO-34-12h (d), SAPO-34-24h (e) and SAPO-34-48h (f).

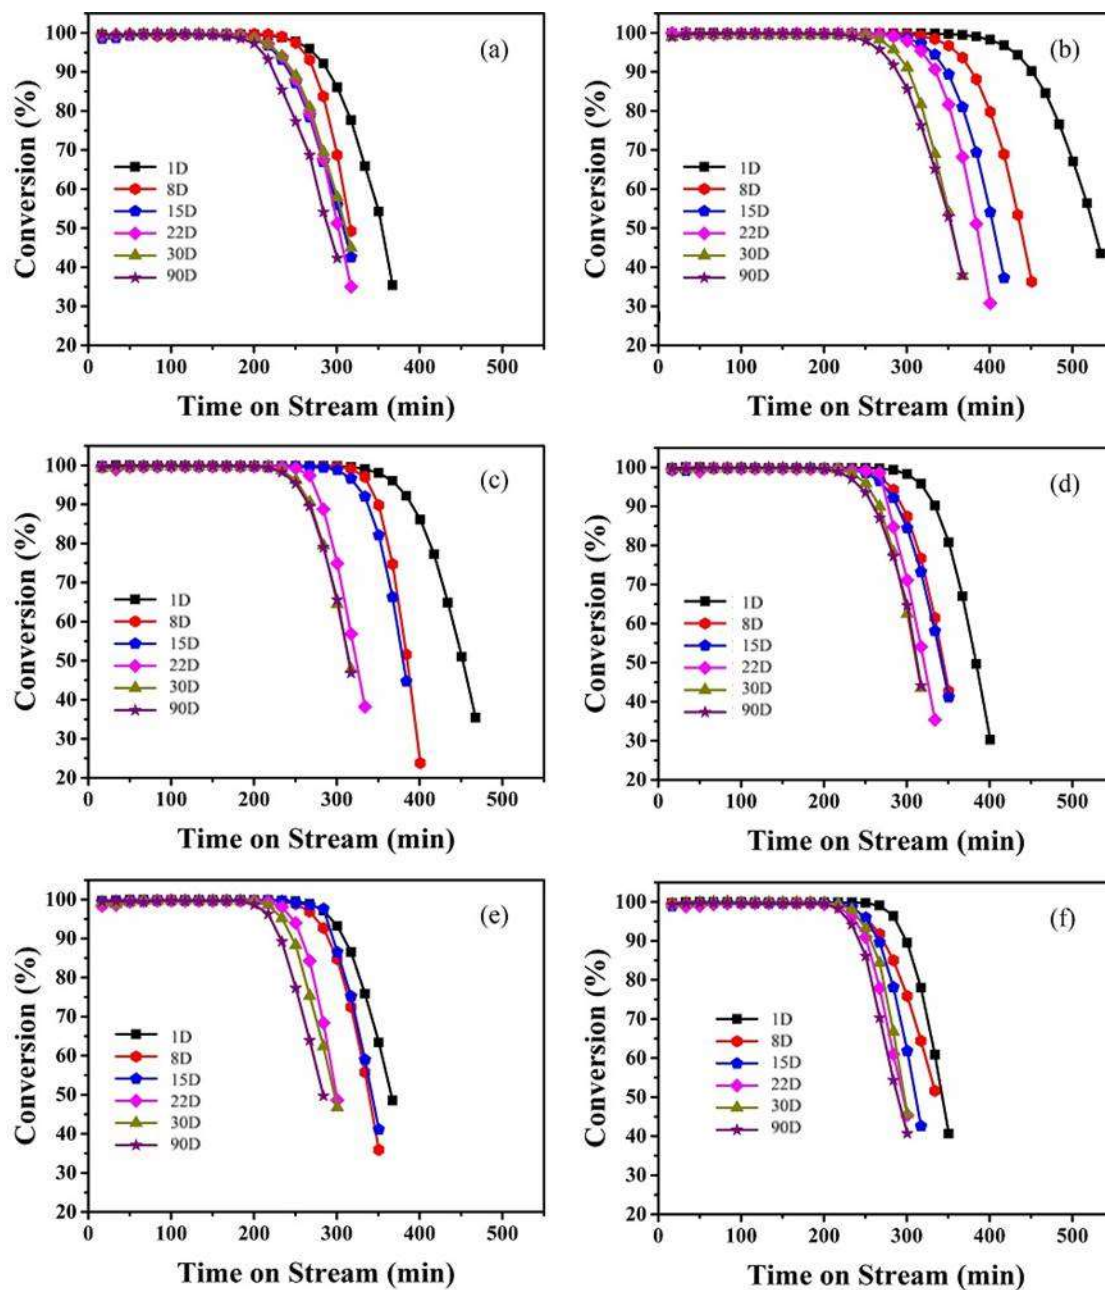

Fig. S3 Methanol conversion variation with time on stream over SAPO-34-3h (a), SAPO-34-4h (b), SAPO-34-8h (c), SAPO-34-12h (d), SAPO-34-24h (e) and SAPO-34-48h (f) in the MTO reaction from freshness to place for 90 days.

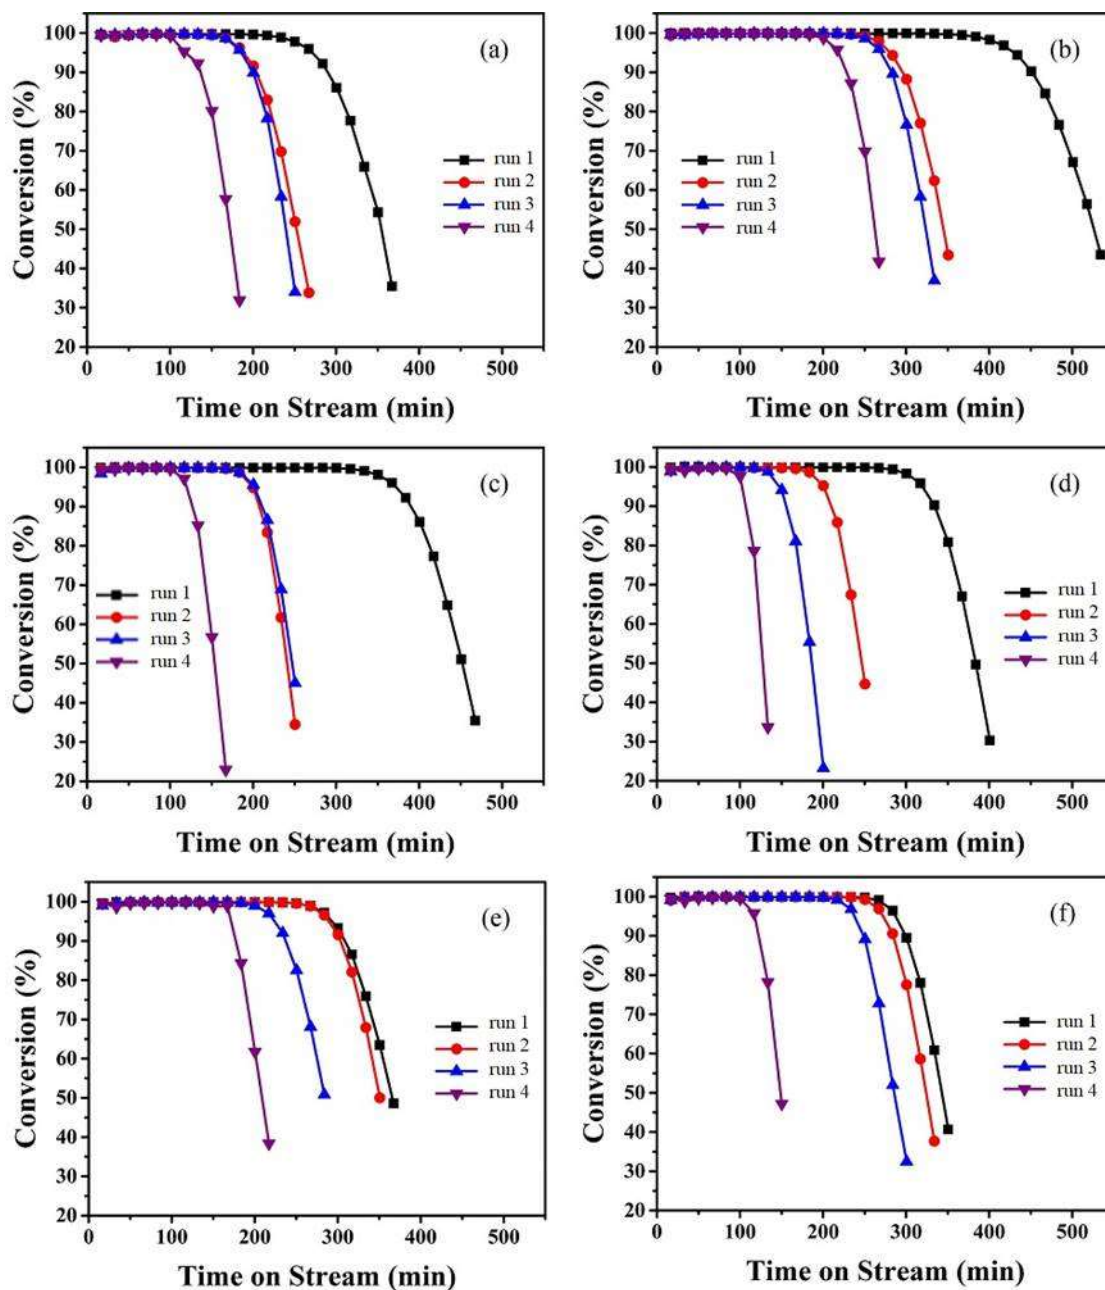

Fig. S4 Methanol conversion variation with time on stream over SAPO-34-3h (a), SAPO-34-4h (b), SAPO-34-8h (c), SAPO-34-12h (d), SAPO-34-24h (e) and SAPO-34-48h (f) in the MTO reaction from freshness to reuse four times.
